# Supplementary material for: An organometallic chimie douce approach to new RexW1–xO3 phases
Source: Royal Society of Chemistry journal article supplement (doi:10.1039/b506088e), 2005-01-01
Supplement: b506088e.pdf [file b506088e.pdf]

Copyright Royal Society of Chemistry, 2005

*Chem. Comm.* **2005**

## **Supporting Information**

for

### **"An organometallic chimie douce approach to new $\text{Re}_x\text{W}_{1-x}\text{O}_3$ phases "**

Christian Helbig, Rudolf Herrmann, Franz Mayr, Ernst-Wilhelm Scheidt, Klaus Tröster, Jan Hanss,  
Hans-Albrecht Krug von Nidda, Gunter Heymann, Hubert Huppertz and Wolfgang Scherer\*

#### **Contents:**

- S1 - Differential thermogravimetric curves
- S2 - TGA curves  $m(T)$

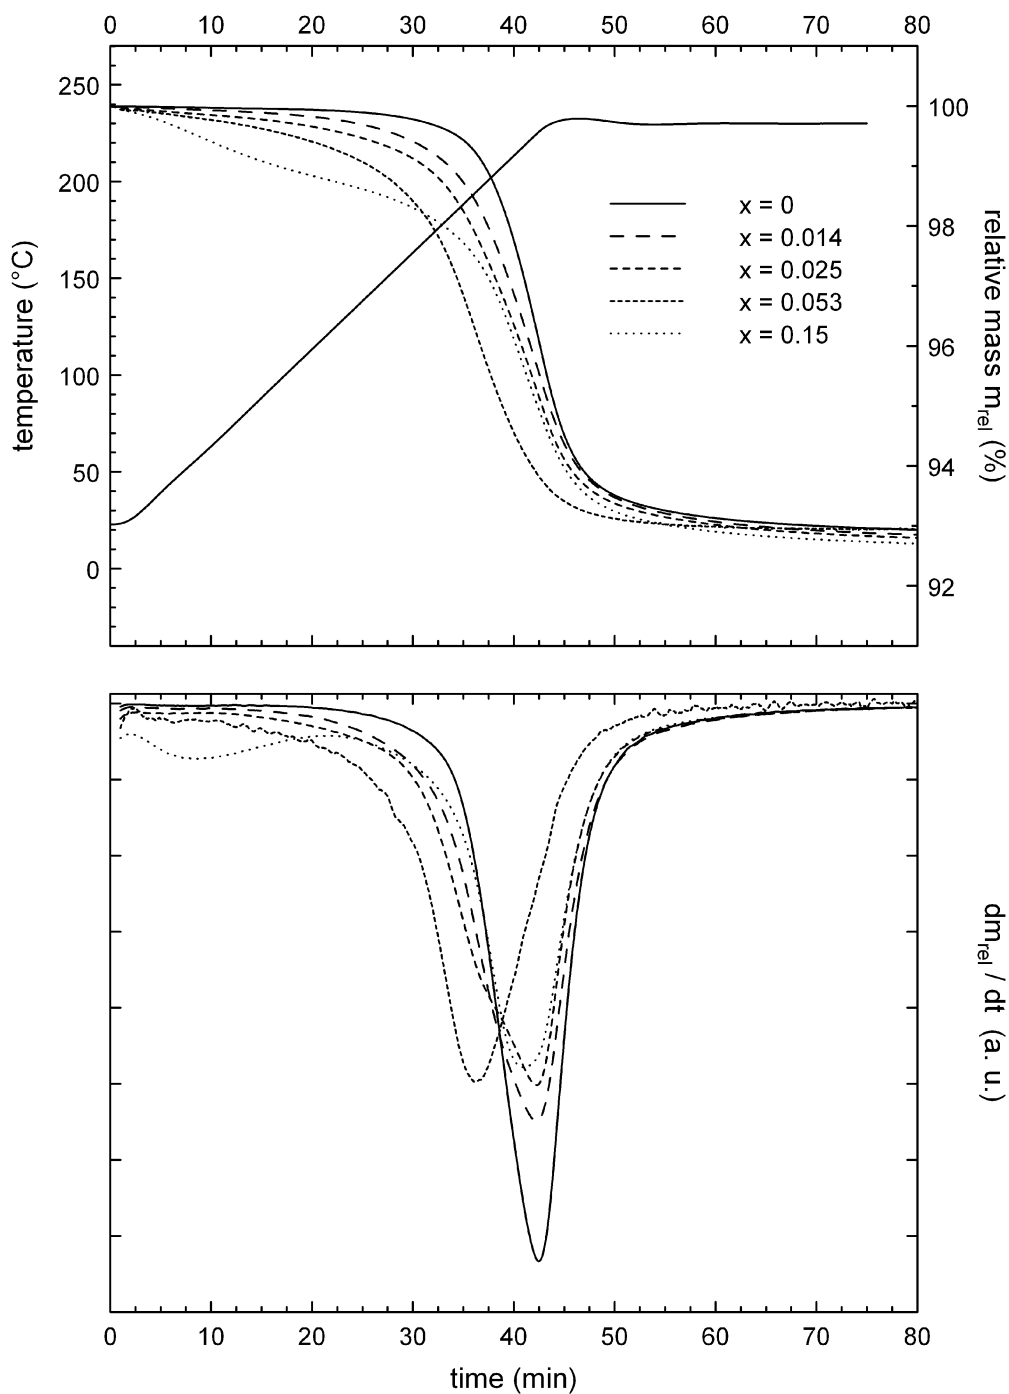

**S1:** Thermogravimetric study of the dehydration process of selected  $\text{Re}_x\text{W}_{1-x}\text{O}_3\cdot\text{H}_2\text{O}$  samples. The  $m_{\text{rel}}(t)$  curves reveal a weight loss of 7% corresponding to a water stoichiometry of one. Maxima in the derivative  $m_{\text{rel}}/dt(t)$  display the moment of greatest weight loss.

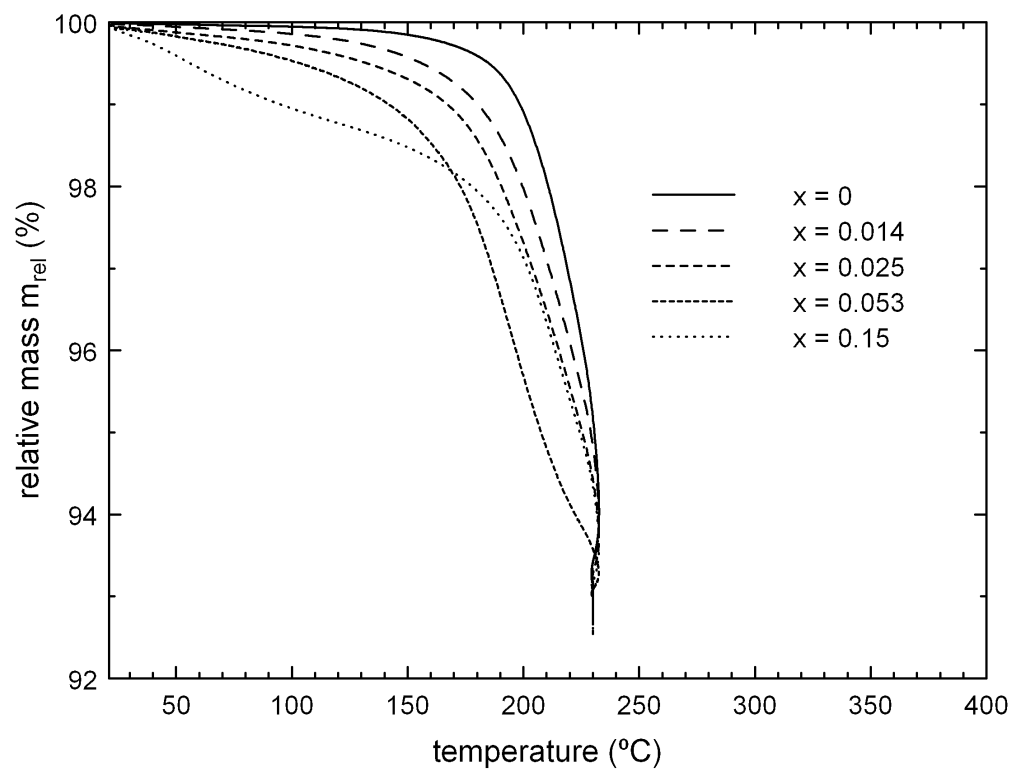

**S2:** In this figure the  $m(T)$  curve is depicted.
